# Supplementary material for: Phylogeny of locusts and grasshoppers reveals complex evolution of density-dependent phenotypic plasticity
Source: PubMed Central journal article supplement (PMC5529561; doi:10.1038/s41598-017-07105-y), 2017-07-26
Supplement: 41598_2017_7105_MOESM1_ESM.pdf [file 41598_2017_7105_MOESM1_ESM.pdf]

## **SUPPLEMENTARY INFORMATION**

Phylogeny of locusts and grasshoppers reveals complex evolution of density-dependent phenotypic plasticity

Hojun Song<sup>1\*</sup>, Bert Foquet<sup>1</sup>, Ricardo Mariño-Pérez<sup>1</sup>, Derek A. Woller<sup>1</sup>

<sup>1</sup>Department of Entomology, Texas A&M University, College Station, TX, U.S.A.

\* Corresponding author: [hsong@tamu.edu](mailto:hsong@tamu.edu); 1-979-845-2481

**Table S1.** Taxon sampling, collecting information, and Genbank accession numbers. tRNA genes have not been submitted to Genbank due to their short sizes, but are available as alignments.

| Taxonomic Information |                        |                            |                                                                                                                                       |
|-----------------------|------------------------|----------------------------|---------------------------------------------------------------------------------------------------------------------------------------|
| TAMUIC-IGC Code       | Genus                  | Species                    | Collecting Information                                                                                                                |
| OR1007                | <i>Schistocerca</i>    | <i>literosa</i>            | Ecuador: Galapagos Is. Espanola, 2-V-1992, Coll. S Peck                                                                               |
| OR1009                | <i>Schistocerca</i>    | <i>melanocera</i>          | Ecuador: Galapagos Is. Isla Floreana, Finca Cruz fg. Of Cerro Comunista, 28-III-1996, Coll. D Otte                                    |
| OR1014                | <i>Halmenus</i>        | <i>robustus</i>            | Ecuador: Galapagos Is. Isla Santa Cruz, trail to Tortuga Bay, 7-III-1996, Coll. D Otte                                                |
| OR1080                | <i>Schistocerca</i>    | <i>obscura</i>             | USA: FL, Suwannee Co. Suwannee River State Park, 30°23.064'N 83°09.655'W, 5-VIII-2002, Coll. H Song                                   |
| OR1086                | <i>Schistocerca</i>    | <i>shoshone</i>            | USA: UT, Utah Co., Goshen, 39°57'6"N 111°54'6"W, 13-IX-2008, Coll. H Song                                                             |
| OR1089                | <i>Schistocerca</i>    | <i>nitens (Costa Rica)</i> | Costa Rica: Limon Province, Veraqua Rainforest Research and Adventure Park, 9°56'20.76"N 83°12'39.96"W, 3-VII-2010, Coll. J Mugleston |
| OR1093                | <i>Schistocerca</i>    | <i>centralis</i>           | Costa Rica, Puntarenas Province, Pacifico Central, Jaco Beach, 9°37'18.67"N 84°38'42.12"W, 29-VI-2010, Coll. J Mugleston              |
| OR1122                | <i>Schistocerca</i>    | <i>lineata (Rubus)</i>     | USA: TX, Colorado Co., Altair, 29°34.310'N and 96°27.135'W, 11-VII-2011, Coll. H Song, TJ Raszick, S Gotham                           |
| OR1158                | <i>Schistocerca</i>    | <i>serialis cubense</i>    | USA: FL, Florida Keys, I-2013, Coll. DA Woller, S Gotham, R Mariño-Pérez                                                              |
| OR1161                | <i>Schistocerca</i>    | <i>pallens (Mexico)</i>    | Mexico: San Luis Potosi, Rancho El Gualul Motorway, Estacion Manuel a Eban, 27-XI-2011, Coll. L Barrientos-Lozano                     |
| OR1166                | <i>Schistocerca</i>    | <i>gregaria</i>            | Egypt, XI-2007, Coll. AA Haggag                                                                                                       |
| OR1167                | <i>Schistocerca</i>    | <i>nitens (USA)</i>        | USA: CA, San Diego, 10-XII-2007, Coll. A Latchininsky                                                                                 |
| OR1168                | <i>Schistocerca</i>    | <i>nitens (N. Mexico)</i>  | Mexico: San Luis Potosi, Rancho El Gualul Motorway, Estacion Manuel a Eban, 27-XI-2011, Coll. L Barrientos-Lozano                     |
| OR1169                | <i>Austracris</i>      | <i>guttulosa</i>           | Australia: Western Australia: 25 KM No Eneabba, 1-IX-2009, Coll. H Song                                                               |
| OR1170                | <i>Cyrtacanthacris</i> | <i>aeruginosa</i>          | South Africa: Western Cape Prov. Cederburg State Forest near Eikeboom, 7-II-2009, Coll. H Song                                        |
| OR1171                | <i>Acanthacris</i>     | <i>ruficornis</i>          | South Africa: Western Cape Prov. Theewaterskloof Dam, 10-II-2009, Coll. H Song                                                        |
| OR1173                | <i>Nomadacris</i>      | <i>septemfasciata</i>      | Madagascar: Fianarantsoa Ranamafana National Park Centre ValBio, 19-22-XI-2008, Coll. G Svenson                                       |
| OR1283                | <i>Schistocerca</i>    | <i>albolineata</i>         | USA: AZ, Pima Co. Tucson Mts. Off Gates Pass Rd. 3-IX-2002, Coll. H.Song                                                              |

| Taxonomic Information |                     |                           |                                                                                                                                        |
|-----------------------|---------------------|---------------------------|----------------------------------------------------------------------------------------------------------------------------------------|
| TAMUIC-IGC Code       | Genus               | Species                   | Collecting Information                                                                                                                 |
| OR1284                | <i>Schistocerca</i> | <i>alutacea</i>           | USA: FL, Walton Co. DeFuniak Springs, off SR 90 W, Oakwood Hills, 30°45.418'N 86°16.661'W, 8-VIII-2002, Coll. H Song                   |
| OR1285                | <i>Schistocerca</i> | <i>rubiginosa</i>         | USA: FL Levy Co. off SR 121, 29°25.908'N 82°24.060'W, 6-VIII-2002, Coll. H Song                                                        |
| OR1287                | <i>Schistocerca</i> | <i>ceratiola</i>          | USA: FL, Putnam Co. Katherine Ordway Preserve on rosemary bush, 29°41.541'N 81°58.675'W, 7-VIII-2002, Coll. H Song                     |
| OR1288                | <i>Schistocerca</i> | <i>lineata (Tamarix)</i>  | USA: CO, Bent Co. John Martin Reservoir SWA, 15-VII-2004, Coll. H Song                                                                 |
| OR1291                | <i>Schistocerca</i> | <i>lineata (Ptelea)</i>   | USA: TX, Burnet Co. Balcones Canyonlands National Wildlife Refuge, VII-2015. Coll. H Song                                              |
| OR1294                | <i>Schistocerca</i> | <i>quisqueya</i>          | Dominican Republic: L RD-060, Monte Rio, 17-XI-2002, Coll. D Perez-Gelabert                                                            |
| OR1295                | <i>Schistocerca</i> | <i>flavofasciata</i>      | British Virgin Island: Guana I. 9-X-2002, Coll. B Valentine                                                                            |
| OR1296                | <i>Schistocerca</i> | <i>pallens (Brazil)</i>   | Brazil: Piaui, Baixada Das Mulheres, Sao Raimundo Nonato, VIII-2005, Coll. S Bybee, K Dittmar                                          |
| OR1297                | <i>Schistocerca</i> | <i>piceifrons</i>         | Mexico: San Luis Potosi, Rancho El Gualul Motorway, Estacion Manuel a Eban, 27-XI-2011, Coll. L Barrientos-Lozano                      |
| OR1300                | <i>Schistocerca</i> | <i>caribbeana</i>         | USVI: St. John, Yawzi Point Trail, 10-VII-2013, Coll. H Song                                                                           |
| OR1302                | <i>Schistocerca</i> | <i>cohni</i>              | Mexico: Oaxaca, Hwy#190 Oaxaca Tehuantepec, 9-XII-2011, Coll. P Fontana, P Tirello, DA Woller, R Mariño-Pérez                          |
| OR1307                | <i>Schistocerca</i> | <i>americana</i>          | USA: FL, Levy Co. Off SR121, 6-VIII-2002, Coll. H Song                                                                                 |
| OR1379                | <i>Schistocerca</i> | <i>damnifica</i>          | USA: FL, Levy Co. Off SR121, 6-VIII-2002, Coll. H Song                                                                                 |
| OR1380                | <i>Schistocerca</i> | <i>socorro</i>            | Mexico: Islas Revillagigedo, Isla Socorro, 20-X-2004, Coll. H Song                                                                     |
| OR1381                | <i>Valanga</i>      | <i>sp</i>                 | PNG: Eastern Highlands Province, Herowana Village Crater Mountain Research Area, 15-19-VII-2001, Coll. S Bradler, KJ Jarvis, G Svenson |
| OR1642                | <i>Schistocerca</i> | <i>cancellata</i>         | Argentina: Catamarca, I-2016, Coll. M Pocco                                                                                            |
| OR1665                | <i>Schistocerca</i> | <i>nitens (S. Mexico)</i> | Mexico: Michoacan, Carapan km #113 N19°50'57.5" W102°03'27.8", 05-XII-2013, Coll. R Mariño-Pérez, P Fontana, O Sanabria-Urban          |
| OR184                 | <i>Anacridium</i>   | <i>incisum</i>            | Namibia: Etosha NP Devilwater Spring (18 59 266 S 15 15 593 E), 18-V-2004, Coll. KB Miller                                             |
| OR185                 | <i>Schistocerca</i> | <i>pallens (Bolivia)</i>  | Bolivia: Santa Cruz Co. Conception (S 16 26.790 W 062 28.984), 12-I-2004, Coll. G Svenson, SL Cameron, S Bybee                         |

| TAMUIC-IGC Code | Genus                  | Species                    | ATP6     | ATP8     | COI      | COII     | COIII    | CYTB     |
|-----------------|------------------------|----------------------------|----------|----------|----------|----------|----------|----------|
| OR1007          | <i>Schistocerca</i>    | <i>literosa</i>            | KY980825 | N/A      | KY980892 | KY980929 | KY980966 | KY981002 |
| OR1009          | <i>Schistocerca</i>    | <i>melanocera</i>          | KY980826 | KY980859 | KY980893 | KY980930 | KY980967 | KY981003 |
| OR1014          | <i>Halmenus</i>        | <i>robustus</i>            | KY980827 | KY980860 | KY980894 | KY980931 | KY980968 | KY981004 |
| OR1080          | <i>Schistocerca</i>    | <i>obscura</i>             | KY980828 | KY980861 | KY980895 | KY980932 | KY980969 | KY981005 |
| OR1086          | <i>Schistocerca</i>    | <i>shoshone</i>            | KY980829 | KY980862 | KY980896 | KY980933 | KY980970 | KY981006 |
| OR1089          | <i>Schistocerca</i>    | <i>nitens (Costa Rica)</i> | KY980830 | KY980863 | KY980897 | KY980934 | KY980971 | KY981007 |
| OR1093          | <i>Schistocerca</i>    | <i>centralis</i>           | KY980831 | KY980864 | KY980898 | KY980935 | KY980972 | KY981008 |
| OR1122          | <i>Schistocerca</i>    | <i>lineata (Rubus)</i>     | KY980832 | KY980865 | KY980899 | KY980936 | KY980973 | KY981009 |
| OR1158          | <i>Schistocerca</i>    | <i>serialis cubense</i>    | KY980833 | KY980866 | KY980900 | KY980937 | KY980974 | KY981010 |
| OR1161          | <i>Schistocerca</i>    | <i>pallens (Mexico)</i>    | KY980834 | KY980867 | KY980901 | KY980938 | KY980975 | KY981011 |
| OR1166          | <i>Schistocerca</i>    | <i>gregaria</i>            | KY980835 | KY980868 | KY980902 | KY980939 | KY980976 | KY981012 |
| OR1167          | <i>Schistocerca</i>    | <i>nitens (USA)</i>        | KY980836 | KY980869 | KY980903 | KY980940 | KY980977 | KY981013 |
| OR1168          | <i>Schistocerca</i>    | <i>nitens (N. Mexico)</i>  | KY980837 | KY980870 | KY980904 | KY980941 | KY980978 | KY981014 |
| OR1169          | <i>Austracris</i>      | <i>guttulosa</i>           | KY980838 | KY980871 | KY980905 | KY980942 | KY980979 | KY981015 |
| OR1170          | <i>Cyrtacanthacris</i> | <i>aeruginosa</i>          | KY980839 | KY980872 | KY980906 | KY980943 | KY980980 | KY981016 |
| OR1171          | <i>Acanthacris</i>     | <i>ruficornis</i>          | KY980840 | KY980873 | KY980907 | KY980944 | KY980981 | KY981017 |
| OR1173          | <i>Nomadacris</i>      | <i>septemfasciata</i>      | KY980841 | KY980874 | KY980908 | KY980945 | KY980982 | KY981018 |
| OR1283          | <i>Schistocerca</i>    | <i>albolineata</i>         | KY980842 | KY980875 | KY980909 | KY980946 | KY980983 | KY981019 |
| OR1284          | <i>Schistocerca</i>    | <i>alutacea</i>            | KY980843 | KY980876 | KY980910 | KY980947 | KY980984 | KY981020 |
| OR1285          | <i>Schistocerca</i>    | <i>rubiginosa</i>          | KY980844 | KY980877 | KY980911 | KY980948 | KY980985 | KY981021 |
| OR1287          | <i>Schistocerca</i>    | <i>ceratiola</i>           | KY980845 | KY980878 | KY980912 | KY980949 | KY980986 | KY981022 |
| OR1288          | <i>Schistocerca</i>    | <i>lineata (Tamarix)</i>   | KY980846 | KY980879 | KY980913 | KY980950 | KY980987 | KY981023 |
| OR1291          | <i>Schistocerca</i>    | <i>lineata (Ptelea)</i>    | KY980847 | KY980880 | KY980914 | KY980951 | KY980988 | KY981024 |
| OR1294          | <i>Schistocerca</i>    | <i>quisqueya</i>           | KY980848 | KY980881 | KY980915 | KY980952 | KY980989 | KY981025 |
| OR1295          | <i>Schistocerca</i>    | <i>flavofasciata</i>       | N/A      | N/A      | KY980916 | KY980953 | N/A      | N/A      |
| OR1296          | <i>Schistocerca</i>    | <i>pallens (Brazil)</i>    | KY980849 | KY980882 | KY980917 | KY980954 | KY980990 | KY981026 |
| OR1297          | <i>Schistocerca</i>    | <i>piceifrons</i>          | KY980850 | KY980883 | KY980918 | KY980955 | KY980991 | KY981027 |
| OR1300          | <i>Schistocerca</i>    | <i>caribbeana</i>          | KY980851 | KY980884 | KY980919 | KY980956 | KY980992 | KY981028 |
| OR1302          | <i>Schistocerca</i>    | <i>cohni</i>               | KY980852 | KY980885 | KY980920 | KY980957 | KY980993 | KY981029 |
| OR1307          | <i>Schistocerca</i>    | <i>americana</i>           | KY980853 | KY980886 | KY980921 | KY980958 | KY980994 | KY981030 |
| OR1379          | <i>Schistocerca</i>    | <i>damnifica</i>           | KY980854 | N/A      | KY980922 | KY980959 | KY980995 | KY981031 |
| OR1380          | <i>Schistocerca</i>    | <i>socorro</i>             | KY980855 | KY980887 | KY980923 | KY980960 | KY980996 | KY981032 |
| OR1381          | <i>Valanga</i>         | <i>sp</i>                  | N/A      | N/A      | KY980924 | KY980961 | KY980997 | N/A      |
| OR1642          | <i>Schistocerca</i>    | <i>cancellata</i>          | KY980856 | KY980888 | KY980925 | KY980962 | KY980998 | KY981033 |
| OR1665          | <i>Schistocerca</i>    | <i>nitens (S. Mexico)</i>  | KY980857 | KY980889 | KY980926 | KY980963 | KY980999 | KY981034 |
| OR184           | <i>Anacridium</i>      | <i>incisum</i>             | KY980823 | KY980858 | KY980890 | KY980927 | KY980964 | KY981000 |
| OR185           | <i>Schistocerca</i>    | <i>pallens (Bolivia)</i>   | KY980824 | N/A      | KY980891 | KY980928 | KY980965 | KY981001 |

| TAMUIC-IGC Code | Genus                  | Species                    | ND1      | ND2      | ND3      | ND4      | ND4L     | ND5      |
|-----------------|------------------------|----------------------------|----------|----------|----------|----------|----------|----------|
| OR1007          | <i>Schistocerca</i>    | <i>literosa</i>            | KY981037 | KY981072 | KY981109 | KY981144 | KY981180 | N/A      |
| OR1009          | <i>Schistocerca</i>    | <i>melanocera</i>          | KY981038 | KY981073 | KY981110 | KY981145 | KY981181 | KY981211 |
| OR1014          | <i>Halmenus</i>        | <i>robustus</i>            | KY981039 | KY981074 | KY981111 | KY981146 | KY981182 | KY981212 |
| OR1080          | <i>Schistocerca</i>    | <i>obscura</i>             | KY981040 | KY981075 | KY981112 | KY981147 | N/A      | KY981213 |
| OR1086          | <i>Schistocerca</i>    | <i>shoshone</i>            | KY981041 | KY981076 | KY981113 | KY981148 | N/A      | KY981214 |
| OR1089          | <i>Schistocerca</i>    | <i>nitens (Costa Rica)</i> | KY981042 | KY981077 | KY981114 | KY981149 | KY981183 | N/A      |
| OR1093          | <i>Schistocerca</i>    | <i>centralis</i>           | KY981043 | KY981078 | KY981115 | KY981150 | KY981184 | KY981215 |
| OR1122          | <i>Schistocerca</i>    | <i>lineata (Rubus)</i>     | KY981044 | KY981079 | KY981116 | KY981151 | KY981185 | KY981216 |
| OR1158          | <i>Schistocerca</i>    | <i>serialis cubense</i>    | KY981045 | KY981080 | KY981117 | KY981152 | KY981186 | KY981217 |
| OR1161          | <i>Schistocerca</i>    | <i>pallens (Mexico)</i>    | KY981046 | KY981081 | KY981118 | KY981153 | KY981187 | KY981218 |
| OR1166          | <i>Schistocerca</i>    | <i>gregaria</i>            | KY981047 | KY981082 | KY981119 | KY981154 | KY981188 | KY981219 |
| OR1167          | <i>Schistocerca</i>    | <i>nitens (USA)</i>        | KY981048 | KY981083 | KY981120 | KY981155 | KY981189 | KY981220 |
| OR1168          | <i>Schistocerca</i>    | <i>nitens (N. Mexico)</i>  | KY981049 | KY981084 | KY981121 | KY981156 | KY981190 | KY981221 |
| OR1169          | <i>Austracris</i>      | <i>guttulosa</i>           | KY981050 | KY981085 | KY981122 | KY981157 | KY981191 | KY981222 |
| OR1170          | <i>Cyrtacanthacris</i> | <i>aeruginosa</i>          | KY981051 | KY981086 | KY981123 | KY981158 | KY981192 | KY981223 |
| OR1171          | <i>Acanthacris</i>     | <i>ruficornis</i>          | KY981052 | KY981087 | KY981124 | KY981159 | KY981193 | KY981224 |
| OR1173          | <i>Nomadacris</i>      | <i>septemfasciata</i>      | KY981053 | KY981088 | KY981125 | KY981160 | KY981194 | KY981225 |
| OR1283          | <i>Schistocerca</i>    | <i>albolineata</i>         | KY981054 | KY981089 | KY981126 | KY981161 | KY981195 | KY981226 |
| OR1284          | <i>Schistocerca</i>    | <i>alutacea</i>            | KY981055 | KY981090 | KY981127 | KY981162 | KY981196 | KY981227 |
| OR1285          | <i>Schistocerca</i>    | <i>rubiginosa</i>          | KY981056 | KY981091 | KY981128 | KY981163 | KY981197 | KY981228 |
| OR1287          | <i>Schistocerca</i>    | <i>ceratiola</i>           | KY981057 | KY981092 | KY981129 | KY981164 | KY981198 | KY981229 |
| OR1288          | <i>Schistocerca</i>    | <i>lineata (Tamarix)</i>   | KY981058 | KY981093 | KY981130 | KY981165 | KY981199 | KY981230 |
| OR1291          | <i>Schistocerca</i>    | <i>lineata (Ptelea)</i>    | KY981059 | KY981094 | KY981131 | KY981166 | KY981200 | KY981231 |
| OR1294          | <i>Schistocerca</i>    | <i>quisqueya</i>           | KY981060 | KY981095 | KY981132 | KY981167 | KY981201 | KY981232 |
| OR1295          | <i>Schistocerca</i>    | <i>flavofasciata</i>       | N/A      | KY981096 | N/A      | N/A      | N/A      | N/A      |
| OR1296          | <i>Schistocerca</i>    | <i>pallens (Brazil)</i>    | KY981061 | KY981097 | KY981133 | KY981168 | KY981202 | KY981233 |
| OR1297          | <i>Schistocerca</i>    | <i>piceifrons</i>          | KY981062 | KY981098 | KY981134 | KY981169 | KY981203 | KY981234 |
| OR1300          | <i>Schistocerca</i>    | <i>caribbeana</i>          | KY981063 | KY981099 | KY981135 | KY981170 | KY981204 | KY981235 |
| OR1302          | <i>Schistocerca</i>    | <i>cohni</i>               | KY981064 | KY981100 | KY981136 | KY981171 | KY981205 | KY981236 |
| OR1307          | <i>Schistocerca</i>    | <i>americana</i>           | KY981065 | KY981101 | KY981137 | KY981172 | KY981206 | KY981237 |
| OR1379          | <i>Schistocerca</i>    | <i>damnifica</i>           | KY981066 | KY981102 | KY981138 | KY981173 | N/A      | KY981238 |
| OR1380          | <i>Schistocerca</i>    | <i>socorro</i>             | KY981067 | KY981103 | KY981139 | KY981174 | KY981207 | KY981239 |
| OR1381          | <i>Valanga</i>         | <i>sp</i>                  | N/A      | KY981104 | KY981140 | KY981175 | N/A      | KY981240 |
| OR1642          | <i>Schistocerca</i>    | <i>cancellata</i>          | KY981068 | KY981105 | KY981141 | KY981176 | KY981208 | KY981241 |
| OR1665          | <i>Schistocerca</i>    | <i>nitens (S. Mexico)</i>  | KY981069 | KY981106 | KY981142 | KY981177 | KY981209 | KY981242 |
| OR184           | <i>Anacridium</i>      | <i>incisum</i>             | KY981035 | KY981070 | KY981107 | KY981143 | KY981178 | KY981210 |
| OR185           | <i>Schistocerca</i>    | <i>pallens (Bolivia)</i>   | KY981036 | KY981071 | KY981108 | KY981144 | KY981179 | N/A      |

| TAMUIC-IGC Code | Genus                  | Species                    | ND6      | 12S      | 16S      | H3       | H2B      |
|-----------------|------------------------|----------------------------|----------|----------|----------|----------|----------|
| OR1007          | <i>Schistocerca</i>    | <i>literosa</i>            | KY981245 | KY980753 | KY980789 | KY923759 | KY923707 |
| OR1009          | <i>Schistocerca</i>    | <i>melanocera</i>          | KY981246 | KY980754 | KY980790 | KY923760 | KY923708 |
| OR1014          | <i>Halmenus</i>        | <i>robustus</i>            | KY981247 | KY980755 | KY980791 | KY923771 | KY923709 |
| OR1080          | <i>Schistocerca</i>    | <i>obscura</i>             | N/A      | KY980756 | KY980792 | KY923763 | KY923710 |
| OR1086          | <i>Schistocerca</i>    | <i>shoshone</i>            | N/A      | KY980757 | KY980793 | KY923769 | KY923711 |
| OR1089          | <i>Schistocerca</i>    | <i>nitens (Costa Rica)</i> | N/A      | KY980758 | KY980794 | KY923778 | KY923712 |
| OR1093          | <i>Schistocerca</i>    | <i>centralis</i>           | KY981248 | KY980759 | KY980795 | KY923761 | KY923713 |
| OR1122          | <i>Schistocerca</i>    | <i>lineata (Rubus)</i>     | N/A      | KY980760 | KY980796 | KY923770 | KY923714 |
| OR1158          | <i>Schistocerca</i>    | <i>serialis cubense</i>    | KY981249 | KY980761 | KY980797 | KY923772 | KY923715 |
| OR1161          | <i>Schistocerca</i>    | <i>pallens (Mexico)</i>    | KY981250 | KY980762 | KY980798 | KY923755 | KY923716 |
| OR1166          | <i>Schistocerca</i>    | <i>gregaria</i>            | KY981251 | KY980763 | KY980799 | KY923753 | KY923717 |
| OR1167          | <i>Schistocerca</i>    | <i>nitens (USA)</i>        | KY981252 | KY980764 | KY980800 | KY923758 | KY923718 |
| OR1168          | <i>Schistocerca</i>    | <i>nitens (N. Mexico)</i>  | KY981253 | KY980765 | KY980801 | KY923777 | KY923719 |
| OR1169          | <i>Austracris</i>      | <i>guttulosa</i>           | KY981254 | KY980766 | KY980802 | KY923752 | KY923720 |
| OR1170          | <i>Cyrtacanthacris</i> | <i>aeruginosa</i>          | KY981255 | KY980767 | N/A      | KY923742 | KY923721 |
| OR1171          | <i>Acanthacris</i>     | <i>ruficornis</i>          | N/A      | KY980768 | KY980803 | KY923743 | KY923741 |
| OR1173          | <i>Nomadacris</i>      | <i>septemfasciata</i>      | KY981256 | KY980769 | KY980804 | KY923749 | KY923722 |
| OR1283          | <i>Schistocerca</i>    | <i>albolineata</i>         | N/A      | KY980770 | KY980805 | KY923766 | KY923723 |
| OR1284          | <i>Schistocerca</i>    | <i>alutacea</i>            | KY981257 | KY980771 | KY980806 | KY923764 | KY923724 |
| OR1285          | <i>Schistocerca</i>    | <i>rubiginosa</i>          | KY981258 | KY980772 | KY980807 | KY923776 | KY923725 |
| OR1287          | <i>Schistocerca</i>    | <i>ceratiola</i>           | KY981259 | KY980773 | KY980808 | KY923767 | KY923726 |
| OR1288          | <i>Schistocerca</i>    | <i>lineata (Tamarix)</i>   | KY981260 | KY980774 | KY980809 | KY923768 | KY923727 |
| OR1291          | <i>Schistocerca</i>    | <i>lineata (Ptelea)</i>    | KY981261 | KY980775 | KY980810 | KY923765 | KY923728 |
| OR1294          | <i>Schistocerca</i>    | <i>quisqueya</i>           | KY981262 | KY980776 | KY980811 | KY923750 | KY923729 |
| OR1295          | <i>Schistocerca</i>    | <i>flavofasciata</i>       | N/A      | KY980777 | KY980812 | KY923746 | KY923730 |
| OR1296          | <i>Schistocerca</i>    | <i>pallens (Brazil)</i>    | KY981263 | KY980778 | KY980813 | KY923756 | KY923731 |
| OR1297          | <i>Schistocerca</i>    | <i>piceifrons</i>          | KY981264 | KY980779 | KY980814 | KY923774 | KY923732 |
| OR1300          | <i>Schistocerca</i>    | <i>caribbeana</i>          | KY981265 | KY980780 | KY980815 | KY923747 | KY923733 |
| OR1302          | <i>Schistocerca</i>    | <i>cohni</i>               | KY981266 | KY980781 | KY980816 | KY923757 | KY923734 |
| OR1307          | <i>Schistocerca</i>    | <i>americana</i>           | KY981267 | KY980782 | KY980817 | KY923773 | KY923735 |
| OR1379          | <i>Schistocerca</i>    | <i>damnifica</i>           | N/A      | KY980783 | KY980818 | KY923762 | KY923736 |
| OR1380          | <i>Schistocerca</i>    | <i>socorro</i>             | KY981268 | KY980784 | KY980819 | KY923775 | KY923737 |
| OR1381          | <i>Valanga</i>         | <i>sp</i>                  | N/A      | N/A      | KY980820 | KY923744 | KY923738 |
| OR1642          | <i>Schistocerca</i>    | <i>cancellata</i>          | KY981269 | KY980785 | KY980821 | KY923748 | KY923739 |
| OR1665          | <i>Schistocerca</i>    | <i>nitens (S. Mexico)</i>  | KY981270 | KY980786 | KY980822 | KY923751 | KY923740 |
| OR184           | <i>Anacridium</i>      | <i>incisum</i>             | KY981243 | KY980751 | KY980787 | KY923745 | KY923705 |
| OR185           | <i>Schistocerca</i>    | <i>pallens (Bolivia)</i>   | KY981244 | KY980752 | KY980788 | KY923754 | KY923706 |

**Table S2.** Survey of density-dependent phenotypic plasticity of the species included in this study.

| Species                                 | Reaction norm in colour | Reaction norm in behaviour | Data Source                                                      |
|-----------------------------------------|-------------------------|----------------------------|------------------------------------------------------------------|
| <i>Anacridium incisum</i>               | unknown                 | unknown                    |                                                                  |
| <i>Acanthacris ruficornis</i>           | plastic                 | non-plastic                | Rowell (1971); COPR (1982); Popov (1989); Song and Wenzel (2008) |
| <i>Cyrtacanthacris aeruginosa</i>       | unknown                 | non-plastic                | COPR (1982); Song and Wenzel (2008)                              |
| <i>Nomadacris septemfasciata</i>        | plastic                 | plastic                    | Dean (1967); Popov (1989); Song and Wenzel (2008)                |
| <i>Valanga</i> sp.                      | unknown                 | unknown                    |                                                                  |
| <i>Austracris guttulosa</i>             | plastic                 | plastic                    | Elder (1989, 1991, 1997); Song and Wenzel (2008)                 |
| <i>Halmenus robustus</i>                | unknown                 | unknown                    |                                                                  |
| <i>Schistocerca albolineata</i>         | unknown                 | non-plastic                | Song (2004)                                                      |
| <i>Schistocerca alutacea</i>            | unknown                 | non-plastic                | Song (2004)                                                      |
| <i>Schistocerca americana</i>           | plastic                 | plastic                    | Gotham and Song (2013)                                           |
| <i>Schistocerca cancellata</i>          | plastic                 | plastic                    | Waloff and Pedgley (1986); Song and Wenzel (2008)                |
| <i>Schistocerca caribbeana</i>          | non-plastic             | non-plastic                | Song, unpublished                                                |
| <i>Schistocerca centralis</i>           | unknown                 | unknown                    |                                                                  |
| <i>Schistocerca ceratiola</i>           | non-plastic             | non-plastic                | Song, unpublished                                                |
| <i>Schistocerca cohni</i>               | unknown                 | unknown                    |                                                                  |
| <i>Schistocerca damnifica</i>           | plastic                 | non-plastic                | Song, unpublished                                                |
| <i>Schistocerca flavofasciata</i>       | plastic                 | non-plastic                | Kevan (1943)                                                     |
| <i>Schistocerca gregaria</i>            | plastic                 | plastic                    | Uvarov (1966); Roessingh et al. (1993); Song and Wenzel (2008)   |
| <i>Schistocerca lineata</i> (Ptelea)    | plastic                 | non-plastic                | Sword (1999); Song and Wenzel (2008)                             |
| <i>Schistocerca lineata</i> (Rubus)     | plastic                 | non-plastic                | Sword (1999); Song and Wenzel (2008)                             |
| <i>Schistocerca lineata</i> (Tamarix)   | plastic                 | non-plastic                | Raszick and Song (2016)                                          |
| <i>Schistocerca literosa</i>            | unknown                 | unknown                    |                                                                  |
| <i>Schistocerca melanocera</i>          | unknown                 | unknown                    |                                                                  |
| <i>Schistocerca nitens</i> (Costa Rica) | unknown                 | unknown                    |                                                                  |
| <i>Schistocerca nitens</i> (N. Mexico)  | unknown                 | unknown                    |                                                                  |
| <i>Schistocerca nitens</i> (S. Mexico)  | unknown                 | unknown                    |                                                                  |
| <i>Schistocerca nitens</i> (USA)        | non-plastic             | non-plastic                | Rowell and Cannis (1971); Song and Wenzel (2008)                 |
| <i>Schistocerca obscura</i>             | plastic                 | non-plastic                | Duck (1944); Song and Wenzel (2008)                              |
| <i>Schistocerca pallens</i> (Bolivia)   | plastic                 | non-plastic                | Antoniou and Robinson (1974); Song and Wenzel (2008)             |
| <i>Schistocerca pallens</i> (Brazil)    | plastic                 | non-plastic                | Antoniou and Robinson (1974); Song and Wenzel (2008)             |

| Species                              | Reaction norm in colour | Reaction norm in behaviour | Data Source                                          |
|--------------------------------------|-------------------------|----------------------------|------------------------------------------------------|
| <i>Schistocerca pallens</i> (Mexico) | plastic                 | non-plastic                | Antoniou and Robinson (1974); Song and Wenzel (2008) |
| <i>Schistocerca piceifrons</i>       | plastic                 | plastic                    | Harvey (1983); Song and Wenzel (2008)                |
| <i>Schistocerca quisqueya</i>        | unknown                 | unknown                    |                                                      |
| <i>Schistocerca rubiginosa</i>       | plastic                 | non-plastic                | Song, unpublished                                    |
| <i>Schistocerca serialis cubense</i> | plastic                 | plastic                    | Gotham and Song (2013)                               |
| <i>Schistocerca shoshone</i>         | unknown                 | non-plastic                | Song (2004)                                          |
| <i>Schistocerca socorro</i>          | unknown                 | unknown                    |                                                      |

## References

1. Antoniou, A. & Robinson, C. J. Laboratory studies on the effect of crowding on phase and the life history of *Schistocerca pallens* (Thunberg) (Orthoptera: Acrididae: Cyrtacanthacridinae). *J. Nat. Hist.* **8**, 701-715 (1974).
2. COPR. *The locust and grasshopper agricultural manual*. (Centre for Overseas Pest Research, 1982).
3. Dean, G. J. W. Observations on the structure of hopper bands and movement of hoppers of the red locust (*Nomadacris septemfasciata* Serville). *Journal of the Entomological Society of Southern Africa* **30**, 1-17 (1967).
4. Duck, L. G. The bionomics of *Schistocerca obscura* (Fabr). *J. Kans. Entomol. Soc.* **17**, 105-119 (1944).
5. Elder, R. J. Laboratory studies on the life history of *Nomadacris guttulosa* (Walker) (Orthoptera: Acrididae). *J. Aust. Entomol. Soc.* **28**, 247-253 (1989).
6. Elder, R. J. Laboratory studies of environmental factors affecting sexual maturation in *Nomadacris guttulosa* (Walker) (Orthoptera: Acrididae). *J. Aust. Entomol. Soc.* **30**, 169-181 (1991).
7. Elder, R. J. Bionomics of *Austracris guttulosa* (Walker) (Orthoptera: Acrididae) during the 1970-75 outbreak in Queensland, Australia. *Aust. J. Entomol.* **36**, 57-67 (1997).
8. Gotham, S. & Song, H. Non-swarming grasshoppers exhibit density-dependent phenotypic plasticity reminiscent of swarming locusts. *J. Insect Physiol.* **59**, 1151-1159 (2013).
9. Harvey, A. W. *Schistocerca piceifrons* (Walker) (Orthoptera: Acrididae), the swarming locust of tropical America: a review. *Bull. ent. Res.* **73**, 171-184 (1983).
10. Kevan, D. K. M. An account of *Schistocerca flavofasciata* (De Geer 1773) in Trinidad (Orthoptera: Acrididae). *Bull. Entomol. Res.* **34**, 291-310 (1943).
11. Popov, G. B. *Nymphs of the Sahelian grasshoppers: an illustrated guide*. (Overseas Development Natural Resources Institute, 1989).
12. Raszick, T. J. & Song, H. The ecotype paradigm: testing the concept in an ecologically divergent grasshopper. *Insect Syst. Evol.* **47**, 363-387 (2016).
13. Roessingh, P., Simpson, S. J. & James, S. Analysis of phase-related changes in behaviour of desert locust nymphs. *Proc. R. Soc. Lond. B* **252**, 43-49 (1993).
14. Rowell, C. H. F. The variable coloration of the acridoid grasshoppers. *Adv. Insect Physiol.* **8**, 145-198 (1971).
15. Rowell, C. H. F. & Cannis, T. L. Environmental factors affecting the green/brown polymorphism in the cyrtacanthacridine grasshopper *Schistocerca vaga* (Scudder). *Acrida* **1**, 69-77 (1971).
16. Song, H. Revision of the Alutacea Group of genus *Schistocerca* (Orthoptera: Acrididae: Cyrtacanthacridinae). *Ann. Entomol. Soc. Am.* **97**, 420-436 (2004).
17. Song, H. & Wenzel, J. W. Phylogeny of bird-grasshopper subfamily Cyrtacanthacridinae (Orthoptera: Acrididae) and the evolution of locust phase polyphenism. *Cladistics* **24**, 515-542 (2008).
18. Sword, G. A. Density-dependent warning coloration. *Nature* **397**, 217 (1999).
19. Uvarov, B. P. *Grasshoppers and Locusts, Vol. 1*. (Cambridge University Press, 1966).
20. Waloff, Z. & Pedgley, D. E. Comparative biogeography and biology of the South American locust, *Schistocerca cancellata* (Serville), and the South African desert locust, *S. gregaria flaviventris* (Burmeister) (Orthoptera: Acrididae): a review. *Bull. ent. Res.* **76**, 1-20 (1986).
